# Supplementary material for: Ultrasonic-Assisted Extraction and Structural Characterization of Chondroitin Sulfate Derived from Jumbo Squid Cartilage
Source: MDPI journal article supplement (doi:10.3390/foods10102363), 2021-10-04
Supplement: s1 [file s1]

# Ultrasonic-Assisted Extraction and Structural Characterization of Chondroitin Sulfate Derived from Jumbo Squid Cartilage

Kai-Ruei Yang <sup>1</sup>, Ming-Fong Tsai <sup>1</sup>, Chwen-Jen Shieh <sup>2</sup>, Osamu Arakawa <sup>3</sup>, Cheng-Di Dong <sup>4</sup>, Chun-Yung Huang <sup>1</sup> and Chia-Hung Kuo <sup>1,\*</sup>

- <sup>1</sup> Department of Seafood Science, National Kaohsiung University of Science and Technology, Kaohsiung 811, Taiwan; karry0710karry@gmail.com (K.-R.Y.); l38982079@gmail.com (M.-F.T.); cyhuang@nkust.edu.tw (C.-Y.H.)
- <sup>2</sup> Biotechnology Center, National Chung Hsing University, Taichung 402, Taiwan; cjshieh@dragon.nchu.edu.tw
- <sup>3</sup> Graduate School of Fisheries Science and Environmental Studies, Nagasaki University, Nagasaki 852-8521, Japan; arakawa@nagasaki-u.ac.jp
- <sup>4</sup> Department of Marine Environmental Engineering, National Kaohsiung University of Science and Technology, Kaohsiung 811, Taiwan
- \* Correspondence: kuoch@nkust.edu.tw; Tel.: +886-7-361-7141 (ext. 23646)

## Supplementary Materials:

**Citation:** Yang, K.-R.; Tsai, M.-F.; Shieh, C.-J.; Arakawa, O.; Dong, C.-D.; Huang, C.-Y.; Kuo, C.-H. Ultrasonic-assisted extraction and structural characterization of chondroitin sulfate derived from jumbo squid cartilage. *Foods* **2021**, *10*, x. <https://doi.org/10.3390/xxxxx>

Academic Editor: Firstname  
Lastname

Received: date  
Accepted: date  
Published: date

**Publisher's Note:** MDPI stays neutral with regard to jurisdictional claims in published maps and institutional affiliations.

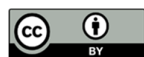

**Copyright:** © 2021 by the authors. Submitted for possible open access publication under the terms and conditions of the Creative Commons Attribution (CC BY) license (<https://creativecommons.org/licenses/by/4.0/>).

**Table S1.** ANOVA of response surface model of all independent variables.

| Source                        | Coefficient | Sum of Squares | d.f. | F-Value  | p-Value    |
|-------------------------------|-------------|----------------|------|----------|------------|
| <b>Model</b>                  |             | 10.9778        | 9    | 123.4175 | < 0.0001** |
| Constant                      | 3.0417      |                | 1    |          |            |
| <b>Liner</b>                  |             |                |      |          |            |
| X <sub>1</sub> -NaOH          | 0.9078      | 0.4827         | 1    | 48.8392  | 0.0009**   |
| X <sub>2</sub> -Temp          | 0.1643      | 5.4658         | 1    | 553.0435 | < 0.0001** |
| X <sub>3</sub> -Time          | 0.0746      | 2.6638         | 1    | 269.5324 | < 0.0001** |
| <b>Interaction</b>            |             |                |      |          |            |
| X <sub>1</sub> X <sub>2</sub> | -0.0129     | 0.2649         | 1    | 26.8007  | 0.0035**   |
| X <sub>1</sub> X <sub>3</sub> | 0.0131      | 1.0918         | 1    | 110.4758 | 0.0001**   |
| X <sub>2</sub> X <sub>3</sub> | -0.0009     | 0.1401         | 1    | 14.1756  | 0.0131*    |
| <b>Quadratic</b>              |             |                |      |          |            |
| X <sub>1</sub> <sup>2</sup>   | -0.0991     | 0.5802         | 1    | 58.7020  | 0.0006**   |
| X <sub>2</sub> <sup>2</sup>   | 0.0001      | 0.0003         | 1    | 0.0309   | 0.8673     |
| X <sub>3</sub> <sup>2</sup>   | -0.0008     | 0.3386         | 1    | 34.2582  | 0.0021**   |
| Residual                      |             | 0.0494         | 5    |          |            |
| Lack of Fit                   |             | 0.0434         | 3    | 4.8243   | 0.1765     |
| Pure Error                    |             | 0.0060         | 2    |          |            |
| R <sup>2</sup>                | 0.9955      |                |      |          |            |

\*Significant at  $p \leq 0.05$ . \*\*Significant at  $p \leq 0.01$ .
